# Supplementary material
Source: ML conference proceedings conference paper supplement (https://openreview.net/forum?id=I3HOxaZIJ0J)
Supplement: supplementary_material [file attachment]

---

# Appendix of Unit Ball Model for Embedding Hierarchical Structures in the Complex Hyperbolic Space

---

Anonymous Author(s)

Affiliation

Address

email

## 1 A Proof of Theorem 1

2 In Section 3.3 in the paper, we presented Theorem 1 about the curvature of the complex hyperbolic  
3 space  $\mathbb{H}_{\mathbb{C}}^n$  (Goldman, 1999):

4 **Theorem 1.** *The curvature is not constant in  $\mathbb{H}_{\mathbb{C}}^n$ . It is pinched between  $-1$  (in the directions of  
5 complex projective lines) and  $-1/4$  (in the directions of totally real planes).*

6 The sketch explanation is that all unit tangent vectors are equivalent, but not all directions are spanned  
7 by two unit tangent vectors. Before proving Theorem 1, we need to introduce the definition of *Kähler*  
8 *structure* (Mok, 1989).

9 **Definition 1** (Kähler structure). *A Kähler structure can be defined in any of the following equivalent  
10 ways:*

- 11 1. *A complex structure with a closed, positive  $(1, 1)$ -form.*
- 12 2. *A Riemannian structure with a complex structure such that the corresponding exterior  
13 2-form is closed.*
- 14 3. *A symplectic structure with a compatible integrable almost complex structure which is  
15 positive.*

16 Recall that in Section 3.3, we defined the complex hyperbolic space  $\mathbb{H}_{\mathbb{C}}^n$  using the projectivization of  
17 the negative zone with a Hermitian form  $\langle\langle \mathbf{z}, \mathbf{w} \rangle\rangle$ . Denote  $\omega$  as the imaginary part of the Hermitian  
18 form  $\langle\langle \cdot, \cdot \rangle\rangle$ , i.e.,  $\omega(\mathbf{z}, \mathbf{w}) = \frac{1}{2i}(\langle\langle \mathbf{z}, \mathbf{w} \rangle\rangle - \langle\langle \mathbf{w}, \mathbf{z} \rangle\rangle)$ , then according to (Goldman, 1999), the metric  $\omega$   
19 is *positive* and *closed*, and necessarily has type  $(1, 1)$ . Then by the first definition in Definition 1,  
20  $\mathbb{H}_{\mathbb{C}}^n$  is a Kähler structure.

21 Let  $M$  be a Kähler manifold and  $\mathbf{z} \in M$ . Denote  $\mathcal{T}_{\mathbf{z}}M$  as the tangent space of  $M$  at  $\mathbf{z}$  and  
22  $J : \mathcal{T}M \rightarrow \mathcal{T}M$  is an endomorphism. As proved in (Kobayashi & Nomizu, 1963), the curvature of  
23 real 2-planes in the tangent space  $\mathcal{T}_{\mathbf{z}}M$  has the following properties:

24 **Theorem 2.** *Let  $M$  be a connected Kähler manifold of complex dimension  $n \geq 2$ . If the holomorphic  
25 sectional curvature  $K(p)$ , where  $p$  is a plane in  $\mathcal{T}_{\mathbf{z}}M$  invariant by  $J$ , depends only on  $\mathbf{z}$ , then  $M$  is a  
26 space of constant holomorphic sectional curvature.*

27 Next, we give a proposition in (Kobayashi & Nomizu, 1963), which is about the curvature of a plane.

28 **Proposition 1.** *If  $\mathbf{u}, \mathbf{v}$  is an orthonormal basis for a plane  $p$  and if we set the curvature of  $p$  as  
29  $K(p) = R(\mathbf{u}, \mathbf{v})$ , where  $R(\mathbf{u}, \mathbf{v})$  is the Riemann curvature tensor, then*

$$K(p) = \frac{1}{4}(1 + 3 \cos^2 \alpha(p)),$$

30 where  $\alpha(p)$  is the angle between  $p$  and  $J(p)$ .

31 Finally, we prove Theorem 1 as follows.

32 *Proof.* Let  $M$  be a Kähler manifold and  $\mathbf{z} \in M$ . From Theorem 2, the corresponding sectional  
 33 curvature function of real 2-planes in  $\mathcal{T}_{\mathbf{z}}M$  is completely determined by the sectional curvature  
 34 function restricted to complex lines in  $\mathcal{T}_{\mathbf{z}}M$ . If the sectional curvature of every complex line in  $\mathcal{T}M$   
 35 equals  $\kappa$ , then  $M$  is said to have constant holomorphic sectional curvature  $\kappa$ .

36 Then from Proposition 1, we can know that in this case, the sectional curvature of a 2-dimensional  
 37 subspace  $S \subset \mathcal{T}M$  is

$$K(S) = \kappa \frac{1 + 3 \cos^2 \alpha(S)}{4}, \quad (\text{A.1})$$

38 where  $\alpha(S)$  is the angle of holomorphy, defined as the smallest angle between two nonzero vectors  
 39 from two linear subspaces of the underlying real vector space of  $M$ .

40 In particular, the complex hyperbolic space  $\mathbb{H}_{\mathbb{C}}^n$  is a Kähler structure with  $\kappa = -1$ . Since  $0 \leq$   
 41  $\cos^2 \alpha(S) \leq 1$ , then from Eq. (A.1), we can have  $-1 \leq K(S) \leq -1/4$  for any 2-dimensional  
 42 subspace  $S \subset \mathcal{T}M$  of  $\mathbb{H}_{\mathbb{C}}^n$ , i.e., the (sectional) curvature is not constant in  $\mathbb{H}_{\mathbb{C}}^n$ , but pinched between  
 43  $-1$  and  $-1/4$ . Thus we proved the non-constant curvature of  $\mathbb{H}_{\mathbb{C}}^n$ .

44 Specifically, we discuss the complex projective lines and totally real planes in the unit ball model of  
 45 the complex hyperbolic space:

$$\mathcal{B}_{\mathbb{C}}^n = \{(z_1, \dots, z_n, 1) \mid |z_1|^2 + \dots + |z_n|^2 < 1\}. \quad (\text{A.2})$$

46 First let's consider the case of complex projective lines. Consider a complex line  $L$  in  $\mathbb{C}^n$  that  
 47 intersects the unit ball model  $\mathcal{B}_{\mathbb{C}}^n$ . Let  $\mathbf{z}$  be any point in  $L \cap \mathcal{B}_{\mathbb{C}}^n$ . We can apply an element of  $\text{PU}(n, 1)$   
 48 to  $L$  so that it becomes the last coordinate axis  $\{(\mathbf{0}, z_n) \mid z_n \in \mathbb{C}\}$ , whose intersection with  $\mathcal{B}_{\mathbb{C}}^n$  is the  
 49 disk  $|z_n| < 1$ . Then the restriction of the Bergman metric to this disc is the Poincaré metric (Beardon,  
 50 2012) of constant curvature  $-1$ .

51 In order to see this, let  $\mathbf{z} = (\mathbf{0}, z_n, 1)$  and  $\mathbf{w} = (\mathbf{0}, w_n, 1)$ ,  $\mathbf{z}, \mathbf{w} \in L \cap \mathcal{B}_{\mathbb{C}}^n$ , then from Eq. (9) in  
 52 Section 4.1, the distance between  $\mathbf{z}$  and  $\mathbf{w}$  is given by

$$d_{\mathcal{B}_{\mathbb{C}}^n}(\mathbf{z}, \mathbf{w}) = \text{arcosh}\left(2 \frac{\langle\langle \mathbf{z}, \mathbf{w} \rangle\rangle \langle\langle \mathbf{w}, \mathbf{z} \rangle\rangle}{\langle\langle \mathbf{z}, \mathbf{z} \rangle\rangle \langle\langle \mathbf{w}, \mathbf{w} \rangle\rangle} - 1\right), \quad (\text{A.3})$$

53 where the Hermitian form  $\langle\langle \mathbf{z}, \mathbf{w} \rangle\rangle$  is a standard Hermitian form:

$$\langle\langle \mathbf{z}, \mathbf{w} \rangle\rangle = z_1 \bar{w}_1 + \dots + z_n \bar{w}_n - z_{n+1} \bar{w}_{n+1}. \quad (\text{A.4})$$

54 Then we have

$$\cosh^2\left(\frac{d_{\mathcal{B}_{\mathbb{C}}^n}(\mathbf{z}, \mathbf{w})}{2}\right) = \frac{\langle\langle \mathbf{z}, \mathbf{w} \rangle\rangle \langle\langle \mathbf{w}, \mathbf{z} \rangle\rangle}{\langle\langle \mathbf{z}, \mathbf{z} \rangle\rangle \langle\langle \mathbf{w}, \mathbf{w} \rangle\rangle} = \frac{|z_n \bar{w}_n - 1|^2}{(|z_n|^2 - 1)(|w_n|^2 - 1)}, \quad (\text{A.5})$$

55 which is just the Poincaré metric (Beardon, 2012).

56 Next consider a totally real plane  $p$ . Any totally real plane  $p$  is the image under an element of  
 57  $\text{PU}(n, 1)$  of the subspace comprising those points of  $\mathcal{B}_{\mathbb{C}}^n$  with real coordinates, that is actually an  
 58 embedded copy of the real hyperbolic space  $\mathbb{H}_{\mathbb{R}}^n = \{(x_1, \dots, x_n) \mid x_1, \dots, x_n \in \mathbb{R}\}$ . This subspace  
 59 intersects  $\mathcal{B}_{\mathbb{C}}^n$  in the subset consisting of those points with  $x_1^2 + \dots + x_n^2 < 1$ . Then the Bergman  
 60 metric restricted to this real-space unit ball is just the Klein-Beltrami metric (Ratcliffe et al., 1994) on  
 61 the unit ball in  $\mathbb{R}^n$  with constant curvature  $-1/4$ .

62 To see this, let  $\mathbf{x} = (x_1, \dots, x_n, 1)$  and  $\mathbf{y} = (y_1, \dots, y_n, 1)$ ,  $\mathbf{x}, \mathbf{y} \in \mathbb{H}_{\mathbb{R}}^n \cap \mathcal{B}_{\mathbb{C}}^n$ , then apply the similar  
 63 process with the above, we have

$$\cosh^2\left(\frac{d_{\mathcal{B}_{\mathbb{C}}^n}(\mathbf{x}, \mathbf{y})}{2}\right) = \frac{\langle\langle \mathbf{x}, \mathbf{y} \rangle\rangle \langle\langle \mathbf{y}, \mathbf{x} \rangle\rangle}{\langle\langle \mathbf{x}, \mathbf{x} \rangle\rangle \langle\langle \mathbf{y}, \mathbf{y} \rangle\rangle} = \frac{(x_1 y_1 + \dots + x_n y_n - 1)^2}{(x_1^2 + \dots + x_n^2 - 1)(y_1^2 + \dots + y_n^2 - 1)}, \quad (\text{A.6})$$

64 which is the Klein-Beltrami metric (Ratcliffe et al., 1994) on the unit ball in  $\mathbb{R}^n$  with constant  
 65 curvature  $-1/4$ .

66 Therefore, we proved that the curvature of  $\mathbb{H}_{\mathbb{C}}^n$  is  $-1$  in the directions of complex projective lines  
 67 while  $-1/4$  in the directions of totally real planes.  $\square$

## 68 B Derivation of distance gradient in the unit ball model

69 The distance function in the unit ball model is given by Eq. (A.3). We need to compute the distance  
70 gradient  $\nabla_E d_{\mathcal{B}_\mathbb{C}^n}(\mathbf{z}, \mathbf{w}) = \frac{\partial d_{\mathcal{B}_\mathbb{C}^n}(\mathbf{z}, \mathbf{w})}{\partial \mathbf{x}} + i \frac{\partial d_{\mathcal{B}_\mathbb{C}^n}(\mathbf{z}, \mathbf{w})}{\partial \mathbf{y}}$  during the Riemannian optimization. The full  
71 derivation is as follows.

72 First, we need to introduce Wirtinger derivatives (Wirtinger, 1927), which constructs a differential  
73 calculus for differential functions on complex domains.

74 **Definition 2** (Wirtinger derivatives). *The partial derivatives of a (complex) function  $f(z)$  of a*  
75 *complex variable  $z = x + iy \in \mathbb{C}, x, y \in \mathbb{R}$ , with respect to  $z$  and  $\bar{z} = x - iy$ , respectively, are*  
76 *defined as:*

$$\frac{\partial f(z, \bar{z})}{\partial z} = \frac{1}{2} \left( \frac{\partial}{\partial x} - i \frac{\partial}{\partial y} \right) f(z, \bar{z}), \quad \frac{\partial f(z, \bar{z})}{\partial \bar{z}} = \frac{1}{2} \left( \frac{\partial}{\partial x} + i \frac{\partial}{\partial y} \right) f(z, \bar{z}).$$

77 The Wirtinger derivatives can be rewritten as:

$$\frac{\partial f(z, \bar{z})}{\partial x} = \left( \frac{\partial}{\partial z} + \frac{\partial}{\partial \bar{z}} \right) f(z, \bar{z}), \quad (\text{B.1})$$

$$\frac{\partial f(z, \bar{z})}{\partial y} = i \left( \frac{\partial}{\partial z} - \frac{\partial}{\partial \bar{z}} \right) f(z, \bar{z}), \quad (\text{B.2})$$

78 Let  $p = \cosh(d_{\mathcal{B}_\mathbb{C}^n}(\mathbf{z}, \mathbf{w})) = 2 \frac{\langle\langle \mathbf{z}, \mathbf{w} \rangle\rangle \langle\langle \mathbf{w}, \mathbf{z} \rangle\rangle}{\langle\langle \mathbf{z}, \mathbf{z} \rangle\rangle \langle\langle \mathbf{w}, \mathbf{w} \rangle\rangle} - 1$ , then  $d_{\mathcal{B}_\mathbb{C}^n}(\mathbf{z}, \mathbf{w}) = \text{arcosh}(p) = \ln(p + \sqrt{p^2 - 1})$ .

79 Let  $\mathbf{z} = (z_1, \dots, z_n, 1) \in \mathcal{B}_\mathbb{C}^n$ , then

$$\begin{aligned} \frac{\partial d_{\mathcal{B}_\mathbb{C}^n}(\mathbf{z}, \mathbf{w})}{\partial z_j} &= \frac{\partial d_{\mathcal{B}_\mathbb{C}^n}(\mathbf{z}, \mathbf{w})}{\partial p} \cdot \frac{\partial p}{\partial z_j} = \frac{1}{\sqrt{p^2 - 1}} \cdot \frac{\partial p}{\partial z_j} \\ &= \frac{2}{\sqrt{p^2 - 1}} \cdot \frac{\partial \left( \frac{(z_1 \bar{w}_1 + \dots + z_n \bar{w}_n - 1) \cdot \langle\langle \mathbf{w}, \mathbf{z} \rangle\rangle}{(z_1 \bar{z}_1 + \dots + z_n \bar{z}_n - 1) \cdot \langle\langle \mathbf{w}, \mathbf{w} \rangle\rangle} \right)}{\partial z_j} \\ &= \frac{2}{\sqrt{p^2 - 1}} \cdot \left( \frac{\bar{w}_j \langle\langle \mathbf{z}, \mathbf{w} \rangle\rangle}{\langle\langle \mathbf{z}, \mathbf{z} \rangle\rangle \cdot \langle\langle \mathbf{w}, \mathbf{w} \rangle\rangle} - \frac{\bar{z}_j \langle\langle \mathbf{z}, \mathbf{w} \rangle\rangle \cdot \langle\langle \mathbf{w}, \mathbf{z} \rangle\rangle}{\langle\langle \mathbf{z}, \mathbf{z} \rangle\rangle^2 \cdot \langle\langle \mathbf{w}, \mathbf{w} \rangle\rangle} \right), \end{aligned} \quad (\text{B.3})$$

80 for  $1 \leq j \leq n$ . Similarly, we can have

$$\frac{\partial d_{\mathcal{B}_\mathbb{C}^n}(\mathbf{z}, \mathbf{w})}{\partial \bar{z}_j} = \frac{2}{\sqrt{p^2 - 1}} \cdot \left( \frac{w_j \langle\langle \mathbf{z}, \mathbf{w} \rangle\rangle}{\langle\langle \mathbf{z}, \mathbf{z} \rangle\rangle \cdot \langle\langle \mathbf{w}, \mathbf{w} \rangle\rangle} - \frac{z_j \langle\langle \mathbf{z}, \mathbf{w} \rangle\rangle \cdot \langle\langle \mathbf{w}, \mathbf{z} \rangle\rangle}{\langle\langle \mathbf{z}, \mathbf{z} \rangle\rangle^2 \cdot \langle\langle \mathbf{w}, \mathbf{w} \rangle\rangle} \right). \quad (\text{B.4})$$

81 Then by Eqs. (B.1), (B.3), and (B.4), we can get

$$\frac{\partial d_{\mathcal{B}_\mathbb{C}^n}}{\partial x_j} = \frac{\partial d_{\mathcal{B}_\mathbb{C}^n}(\mathbf{z}, \mathbf{w})}{\partial z_j} + \frac{\partial d_{\mathcal{B}_\mathbb{C}^n}(\mathbf{z}, \mathbf{w})}{\partial \bar{z}_j} = \frac{4}{\sqrt{p^2 - 1}} \left( \frac{\text{Re}(\langle\langle \mathbf{z}, \mathbf{w} \rangle\rangle w_j)}{\langle\langle \mathbf{z}, \mathbf{z} \rangle\rangle \langle\langle \mathbf{w}, \mathbf{w} \rangle\rangle} - \frac{\langle\langle \mathbf{z}, \mathbf{w} \rangle\rangle \langle\langle \mathbf{w}, \mathbf{z} \rangle\rangle x_j}{\langle\langle \mathbf{z}, \mathbf{z} \rangle\rangle^2 \langle\langle \mathbf{w}, \mathbf{w} \rangle\rangle} \right). \quad (\text{B.5})$$

82 Similarly, by Eqs. (B.2), (B.3), and (B.4), we can get

$$\frac{\partial d_{\mathcal{B}_\mathbb{C}^n}}{\partial y_j} = i \left( \frac{\partial d_{\mathcal{B}_\mathbb{C}^n}(\mathbf{z}, \mathbf{w})}{\partial z_j} - \frac{\partial d_{\mathcal{B}_\mathbb{C}^n}(\mathbf{z}, \mathbf{w})}{\partial \bar{z}_j} \right) = \frac{4}{\sqrt{p^2 - 1}} \left( \frac{\text{Im}(\langle\langle \mathbf{z}, \mathbf{w} \rangle\rangle w_j)}{\langle\langle \mathbf{z}, \mathbf{z} \rangle\rangle \langle\langle \mathbf{w}, \mathbf{w} \rangle\rangle} - \frac{\langle\langle \mathbf{z}, \mathbf{w} \rangle\rangle \langle\langle \mathbf{w}, \mathbf{z} \rangle\rangle y_j}{\langle\langle \mathbf{z}, \mathbf{z} \rangle\rangle^2 \langle\langle \mathbf{w}, \mathbf{w} \rangle\rangle} \right), \quad (\text{B.6})$$

83 where  $\text{Re}(\cdot)$  and  $\text{Im}(\cdot)$  denote the real and the imaginary part respectively. Then we can have

$$\frac{\partial d_{\mathcal{B}_\mathbb{C}^n}}{\partial \mathbf{x}} = \frac{4}{\sqrt{p^2 - 1}} \left( \frac{\text{Re}(\langle\langle \mathbf{z}, \mathbf{w} \rangle\rangle \mathbf{w})}{\langle\langle \mathbf{z}, \mathbf{z} \rangle\rangle \langle\langle \mathbf{w}, \mathbf{w} \rangle\rangle} - \frac{\langle\langle \mathbf{z}, \mathbf{w} \rangle\rangle \langle\langle \mathbf{w}, \mathbf{z} \rangle\rangle \mathbf{x}}{\langle\langle \mathbf{z}, \mathbf{z} \rangle\rangle^2 \langle\langle \mathbf{w}, \mathbf{w} \rangle\rangle} \right), \quad (\text{B.7})$$

$$\frac{\partial d_{\mathcal{B}_\mathbb{C}^n}}{\partial \mathbf{y}} = \frac{4}{\sqrt{p^2 - 1}} \left( \frac{\text{Im}(\langle\langle \mathbf{z}, \mathbf{w} \rangle\rangle \mathbf{w})}{\langle\langle \mathbf{z}, \mathbf{z} \rangle\rangle \langle\langle \mathbf{w}, \mathbf{w} \rangle\rangle} - \frac{\langle\langle \mathbf{z}, \mathbf{w} \rangle\rangle \langle\langle \mathbf{w}, \mathbf{z} \rangle\rangle \mathbf{y}}{\langle\langle \mathbf{z}, \mathbf{z} \rangle\rangle^2 \langle\langle \mathbf{w}, \mathbf{w} \rangle\rangle} \right), \quad (\text{B.8})$$

84 which are Eqs. (17) and (18) in Section 4.3 in the paper.

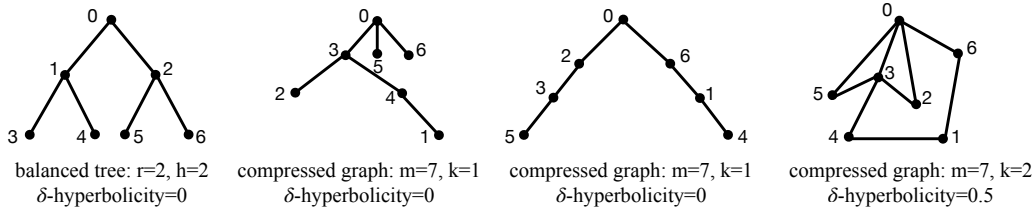

Figure 1: Simple examples of the synthetic data. The numbers  $\{0, 1, \dots, 6\}$  represent the nodes. The compressed graph- $(m = 7, k = 2)$  on the right are aggregated from the middle two compressed graphs- $(m = 7, k = 1)$ .

## 85 C Definition of $\delta$ -hyperbolicity

86 In this section, we give the definition of  $\delta$ -hyperbolicity (Gromov, 1987), which measures the tree-  
87 likeness of graphs. The lower  $\delta$  corresponds to the more tree-like graph. Trees have 0  $\delta$ -hyperbolicity.

88 **Definition 3** ( $\delta$ -hyperbolicity). *Let  $a, b, c, d$  be vertices of the graph  $G$ . Let  $S_1, S_2$  and  $S_3$  be*

$$S_1 = \text{dist}(a, b) + \text{dist}(d, c), S_2 = \text{dist}(a, c) + \text{dist}(b, d), S_3 = \text{dist}(a, d) + \text{dist}(b, c).$$

89 *Suppose  $M_1$  and  $M_2$  are the two largest values among  $S_1, S_2, S_3$  and  $M_1 \geq M_2$ . Define*  
90  *$\text{hyp}(a, b, c, d) = M_1 - M_2$ . Then the  $\delta$ -hyperbolicity of  $G$  is defined as*

$$\delta(G) = \frac{1}{2} \max_{a, b, c, d \in V(G)} \text{hyp}(a, b, c, d).$$

91 *That is,  $\delta(G)$  is the maximum of  $\text{hyp}$  over all possible 4-tuples  $(a, b, c, d)$  divided by 2.*

## 92 D More experiments

### 93 D.1 Synthetic data

94 In Section 5.1.1 in the paper, we introduced how we generate the synthetic data:

95 **Synthetic.** We generate various balanced trees and compressed graphs using the NetworkX package.<sup>1</sup>  
96 For **balanced trees**, we generate the balanced tree with degree  $r$  and depth  $h$ . For **compressed**  
97 **graphs**, we generate  $k$  random trees on  $m$  nodes and then aggregate their edges to form a graph.

98 We give some examples of the synthetic data in Figure 1. As we can see, the compressed graphs-  
99  $(m = 7, k = 1)$  are random trees on 7 nodes, so their  $\delta$ -hyperbolicities are 0. The compressed  
100 graph- $(m = 7, k = 2)$  is no longer a tree after aggregating from two trees. Its local structures are  
101 more varying and complicated.

### 102 D.2 Hardware

103 We conduct all the experiments except TreeRep on four NVIDIA GTX 1080Ti GPUs with 8GB  
104 memory each. For TreeRep, we need more memory to store the distance matrices, so we use a 96-core  
105 NVIDIA T4 GPU server with 503GB memory.

### 106 D.3 Hyperparameters

107 For the baselines (TreeRep (Sonthalia & Gilbert, 2020),<sup>2</sup> Euclidean, Poincaré (Nickel & Kiela,  
108 2017), and Hyperboloid (Nickel & Kiela, 2018)),<sup>3</sup> we use their public codes to train the embeddings.  
109 For all methods, we tune the hyperparameters by grid search. For the graph reconstruction task,

<sup>1</sup><https://networkx.org/documentation/stable/reference/generators.html>

<sup>2</sup><https://github.com/rsonthal/TreeRep>.

<sup>3</sup><https://github.com/facebookresearch/poincare-embeddings>. The repository provides the implementation for Euclidean, Poincaré, and Hyperboloid.

Table 1: Hyperparameters of all methods.

| Model       | Synthetic                                                                                                                                                                                                             | ICD10                                                                                                                                                                                                                | YAGO3-wikiObjects                                                                                                                                                                                                  | WordNet-noun                                                                                                                                                                                                         |
|-------------|-----------------------------------------------------------------------------------------------------------------------------------------------------------------------------------------------------------------------|----------------------------------------------------------------------------------------------------------------------------------------------------------------------------------------------------------------------|--------------------------------------------------------------------------------------------------------------------------------------------------------------------------------------------------------------------|----------------------------------------------------------------------------------------------------------------------------------------------------------------------------------------------------------------------|
| TreeRep     | iterations: 20;<br>optimization: <i>no opt</i> ;<br>pre-allocation fraction: 2.0;<br>nthreads: 16;<br>terminated edge weight: 0;<br>trials/dataset: 3                                                                 | iterations: 32;<br>optimization: <i>no opt</i> ;<br>pre-allocation fraction: 1.3;<br>nthreads: 16;<br>terminated edge weight: 0;<br>trials/dataset: 3                                                                | iterations: 32;<br>optimization: <i>no opt</i> ;<br>pre-allocation fraction: 1.3;<br>nthreads: 16;<br>terminated edge weight: 0;<br>trials/dataset: 3                                                              | iterations: 1;<br>optimization: <i>no opt</i> ;<br>pre-allocation fraction: 1.3;<br>nthreads: 16;<br>terminated edge weight: 0;<br>trials/dataset: 3                                                                 |
| Euclidean   | -                                                                                                                                                                                                                     | manifold: <i>euclidean</i> ;<br>learning rate: 1;<br>epochs: 1500;<br>dampening: 0.75;<br>burnin: 20;<br>burnin multiplier: 0.01;<br>negative sample: 50;<br>negative multiplier: 0.1;<br>max norm: 50000            | manifold: <i>euclidean</i> ;<br>learning rate: 1;<br>epochs: 1200;<br>dampening: 0.75;<br>burnin: 20;<br>burnin multiplier: 0.01;<br>negative sample: 50;<br>negative multiplier: 0.1;<br>max norm: 50000          | manifold: <i>euclidean</i> ;<br>learning rate: 1;<br>epochs: 1500;<br>dampening: 0.75;<br>burnin: 20;<br>burnin multiplier: 0.01;<br>negative sample: 50;<br>negative multiplier: 0.1;<br>max norm: 50000            |
| Poincaré    | manifold: <i>poincare</i> ;<br>learning rate: 0.3;<br>epochs: 1500;<br>dampening: 0.75;<br>burnin: 20;<br>burnin multiplier: 0.01;<br>negative sample: 50;<br>negative multiplier: 0.1;<br>max norm: $1 - e^{-5}$     | manifold: <i>poincare</i> ;<br>learning rate: 1;<br>epochs: 1500;<br>dampening: 1.0;<br>burnin: 20;<br>burnin multiplier: 0.01;<br>negative sample: 50;<br>negative multiplier: 0.1;<br>max norm: $1 - e^{-5}$       | manifold: <i>poincare</i> ;<br>learning rate: 1;<br>epochs: 1200;<br>dampening: 1.0;<br>burnin: 20;<br>burnin multiplier: 0.01;<br>negative sample: 50;<br>negative multiplier: 0.1;<br>max norm: $1 - e^{-5}$     | manifold: <i>poincare</i> ;<br>learning rate: 1;<br>epochs: 1500;<br>dampening: 1.0;<br>burnin: 20;<br>burnin multiplier: 0.01;<br>negative sample: 50;<br>negative multiplier: 0.1;<br>max norm: $1 - e^{-5}$       |
| Hyperboloid | manifold: <i>lorentz</i> ;<br>learning rate: 0.3;<br>epochs: 1500;<br>dampening: 0.75;<br>burnin: 20;<br>burnin multiplier: 0.01;<br>negative sample: 50;<br>negative multiplier: 0.1;<br>max norm: <i>no-maxnorm</i> | manifold: <i>lorentz</i> ;<br>learning rate: 0.5;<br>epochs: 1500;<br>dampening: 1.0;<br>burnin: 20;<br>burnin multiplier: 0.01;<br>negative sample: 50;<br>negative multiplier: 0.1;<br>max norm: <i>no-maxnorm</i> | manifold: <i>lorentz</i> ;<br>learning rate: 1;<br>epochs: 1200;<br>dampening: 1.0;<br>burnin: 20;<br>burnin multiplier: 0.01;<br>negative sample: 50;<br>negative multiplier: 0.1;<br>max norm: <i>no-maxnorm</i> | manifold: <i>lorentz</i> ;<br>learning rate: 0.5;<br>epochs: 1500;<br>dampening: 1.0;<br>burnin: 20;<br>burnin multiplier: 0.01;<br>negative sample: 50;<br>negative multiplier: 0.1;<br>max norm: <i>no-maxnorm</i> |
| UnitBall    | manifold: <i>unitball</i> ;<br>learning rate: 8;<br>epochs: 1500;<br>dampening: 0.75;<br>burnin: 20;<br>burnin multiplier: 0.01;<br>negative sample: 50;<br>negative multiplier: 0.1;<br>max norm: $1 - e^{-5}$       | manifold: <i>unitball</i> ;<br>learning rate: 11;<br>epochs: 200;<br>dampening: 1.0;<br>burnin: 20;<br>burnin multiplier: 0.01;<br>negative sample: 50;<br>negative multiplier: 0.1;<br>max norm: $1 - e^{-5}$       | manifold: <i>unitball</i> ;<br>learning rate: 14;<br>epochs: 1200;<br>dampening: 1.0;<br>burnin: 20;<br>burnin multiplier: 0.01;<br>negative sample: 50;<br>negative multiplier: 0.1;<br>max norm: $1 - e^{-5}$    | manifold: <i>unitball</i> ;<br>learning rate: 12;<br>epochs: 900;<br>dampening: 1.0;<br>burnin: 20;<br>burnin multiplier: 0.01;<br>negative sample: 50;<br>negative multiplier: 0.1;<br>max norm: $1 - e^{-5}$       |

110 we tune the hyperparameters on balanced tree-(15,3) in 20-dimensional embedding spaces (10-  
 111 dimensional complex hyperbolic space for UnitBall), while for the link prediction task, we tune  
 112 the hyperparameters on the validation sets in 32-dimensional embedding spaces (16-dimensional  
 113 complex hyperbolic space for UnitBall). The hyperparameters are given in Table 1.

#### 114 D.4 Evaluation

115 Our evaluation closely follows the setting of (Nickel & Kiela, 2017, 2018), which infers the hierarchies  
 116 from distances in the embedding space. Specifically, for each test edge  $(z, w)$ , we compute the  
 117 distance between the embeddings  $d_{\mathcal{B}_c^n}(z, w)$  and rank it among the distances of all unobserved edges  
 118 for  $z$ :  $\{d_{\mathcal{B}_c^n}(z, w') : (z, w') \notin \text{Training}\}$ . We then report the following evaluation metrics of the  
 119 rankings. Denote  $E_{test}$  as the test edge set and  $V = \{z | \exists w, (z, w) \in E_{test}\}$  as the test node set. Let  
 120  $NE_z = \{w_1, w_2, \dots, w_{|NE_z|}\}$  be the ground truth neighbor set of node  $z$ .

121 **Mean average precision (MAP).** The average precision (AP) is a way to summarize the precision-  
 122 recall curve into a single value representing the average of all precisions and the MAP score is  
 123 calculated by taking the mean AP over all classes. For a node  $z$ , from the learned embeddings, we  
 124 can obtain the nodes closest to its embedding  $z$ . Let  $R_{z, w_i}$  be the smallest set of such nodes that  
 125 contains  $w_i$  (the  $i$ -th neighbor of  $z$ ). Then the MAP is defined as:

$$\text{MAP} = \frac{1}{|V|} \sum_{z \in V} \frac{1}{|NE_z|} \sum_{w_i \in NE_z} \text{Precision}(R_{z, w_i}).$$

126 **Mean reciprocal rank (MRR).** The MRR is a statistic measure for evaluating a list of possible  
 127 responses to a sample of queries, ordered by the probability of correctness. For a node  $z$ , from the  
 128 learned embeddings, we can rank its distances with other nodes from the smallest to the largest. Let

Table 2: Evaluation of graph reconstruction on the real-world data (the dimension is 32 for TreeRep and 16 for UnitBall). For memory cost, the unit is *GiB*.

|          | ICD10 |        |        | YAGO3-wikiObjects |        |        | WordNet-noun |        |        |
|----------|-------|--------|--------|-------------------|--------|--------|--------------|--------|--------|
|          | MRR   | Hits@1 | Memory | MRR               | Hits@1 | Memory | MRR          | Hits@1 | Memory |
| TreeRep  | 26.74 | 91.97  | 30     | 36.71             | 95.39  | 21     | 16.99        | 90.51  | 226    |
| UnitBall | 47.47 | 98.93  | 0.005  | 39.65             | 96.10  | 0.005  | 28.88        | 94.95  | 0.02   |

129  $rank_{w_i}$  be the rank of  $w_i$  (the  $i$ -th neighbor of  $z$ ). Then the MRR is defined as:

$$\text{MRR} = \frac{1}{|V|} \sum_{z \in V} \frac{1}{|NE_z|} \sum_{w_i \in NE_z} \frac{1}{rank_{w_i}}.$$

130 **The proportion of correct types that rank no larger than  $N$  (Hits@ $N$ ).** Hits@ $N$  measures  
 131 whether the top  $N$  predictions contain the ground truth labels. For a node  $z$ , from the learned  
 132 embeddings, we can obtain the set of  $N$  nodes closest to its embedding  $z$ , denoted as  $R_z^N$ . Then the  
 133 Hits@ $N$  is defined as:

$$\text{Hits@}N = \frac{1}{|V|} \sum_{z \in V} \mathbb{I}(|R_z^N \cap NE_z| \geq 1),$$

134 where  $\mathbb{I}(|R_z^N \cap NE_z| \geq 1)$  is the indicator function.

### 135 D.5 Comparison with TreeRep on real-world data reconstruction

136 In this section, we compare UnitBall with TreeRep on the real-world taxonomy reconstruction task.  
 137 The results are presented in Table 2. As we analyzed in Section 5.3.1, TreeRep, as a combinatorial  
 138 construction-based embedding method, is more suitable for the graph reconstruction task. Its  
 139 performance is much better than that on the link prediction task. In addition, UnitBall outperforms  
 140 TreeRep on reconstructing real-world taxonomies with varying structures.

141 We also notice the memory issues of the combinatorial construction-based embedding methods.  
 142 Although TreeRep is very efficient in embedding tree structures since it does not need the gradient-  
 143 based optimization steps, it costs more memory resources for constructing the tree structures from  
 144 data. It is basically a computation time vs. memory cost trade-off issue. For a graph with  $m$  nodes,  
 145 TreeRep needs to construct a matrix of size  $c \cdot m \times c \cdot m$  to construct the tree structure, where  
 146  $1 \leq c \leq 2$  is a hyperparameter. We report the memory cost (*GiB*) in Table 2. UnitBall costs much  
 147 less memory to learn the embeddings.

### 148 D.6 More results on various dimensions

149 In Section 5.3.2, we reported the performances in different embedding dimensions on YAGO3-  
 150 wikiObjects because of the page limits. Here we present the results in 8-d, 32-d, and 128-d embedding  
 151 spaces (4-d, 16-d and 64-d complex hyperbolic spaces for UnitBall) on ICD10 and WordNet-noun in  
 152 Table 3. Again, we see that with the increase of the embedding dimension, Euclidean can have big  
 153 improvements, but its performances in 128-d still cannot surpass UnitBall and the hyperbolic models  
 154 in 8-d. UnitBall outperforms the baselines almost all the time. Although on WordNet-noun, UnitBall  
 155 in 4-d has slightly lower MAP and MRR than Poincaré and Hyperboloid in 8-d, it has significantly  
 156 higher Hits@3.

### 157 D.7 Comparison with trainable curvature method AttH

158 Our work focuses on the representation of single-relation graphs, which is a different research  
 159 topic with multi-relational graph embeddings or knowledge graph embeddings, so it is hard to find  
 160 an appropriate experimental setting to compare them. Nevertheless, to address the concerns of  
 161 comparison with the trainable curvature method, here we evaluate AttH (Chami et al., 2020) on the  
 162 single-relation taxonomy link prediction task. We tune the hyperparameters on the validation set and  
 163 report the mean results over 5 running executions.

Table 3: Evaluation of taxonomy link prediction in different embedding dimensions (the embedding dimension for UnitBall is half of other models). The best results are shown in boldface. The second best results are underlined. TreeRep is not applicable to 128-d WordNet-noun due to the large memory cost so we do not include the results.

|             | ICD10         |              |              |                |              |              |                 |              |              |
|-------------|---------------|--------------|--------------|----------------|--------------|--------------|-----------------|--------------|--------------|
|             | 8-dimensional |              |              | 32-dimensional |              |              | 128-dimensional |              |              |
|             | MAP           | MRR          | Hits@3       | MAP            | MRR          | Hits@3       | MAP             | MRR          | Hits@3       |
| Euclidean   | 2.57          | 2.57         | 1.32         | 3.75           | 3.72         | 2.39         | 10.83           | 10.48        | 4.66         |
| TreeRep     | 3.44          | 3.90         | 6.03         | 4.96           | 7.92         | 8.49         | 8.09            | 8.74         | 17.23        |
| Poincaré    | <u>35.73</u>  | <u>34.94</u> | <u>53.10</u> | <u>35.24</u>   | <u>34.45</u> | 52.71        | 34.47           | 33.70        | 52.19        |
| Hyperboloid | <u>35.56</u>  | <u>34.77</u> | <u>51.90</u> | 34.80          | 34.01        | <u>52.88</u> | 34.93           | <u>34.15</u> | 52.98        |
| UnitBall    | <b>44.05</b>  | <b>43.26</b> | <b>61.54</b> | <b>47.88</b>   | <b>46.96</b> | <b>70.28</b> | <b>46.54</b>    | <b>45.59</b> | <b>70.03</b> |
|             | WordNet-noun  |              |              |                |              |              |                 |              |              |
|             | 8-dimensional |              |              | 32-dimensional |              |              | 128-dimensional |              |              |
|             | MAP           | MRR          | Hits@3       | MAP            | MRR          | Hits@3       | MAP             | MRR          | Hits@3       |
| Euclidean   | 1.07          | 1.05         | 0.63         | 5.59           | 5.36         | 3.16         | 14.33           | 13.35        | 8.82         |
| Poincaré    | <u>25.23</u>  | <u>23.78</u> | <u>27.63</u> | 25.46          | 23.99        | <u>27.80</u> | 25.33           | 23.86        | 27.41        |
| Hyperboloid | <b>25.73</b>  | <b>24.24</b> | <u>27.67</u> | <u>25.65</u>   | <u>24.15</u> | 27.50        | <u>25.77</u>    | <u>24.27</u> | <u>27.65</u> |
| UnitBall    | 24.91         | 23.76        | <b>30.27</b> | <b>27.29</b>   | <b>25.93</b> | <b>32.95</b> | <b>27.29</b>    | <b>25.91</b> | <b>32.77</b> |

Table 4: Evaluation of taxonomy link prediction on YAGO3-wikiObjects (the dimension is 32 for AttH and 16 for UnitBall).

|          | MAP   | MRR   | Hits@1 | Hits@3 |
|----------|-------|-------|--------|--------|
| AttH     | 30.22 | 28.47 | 9.10   | 43.83  |
| UnitBall | 33.33 | 31.85 | 15.62  | 47.41  |

164 From the results in Table 4, we see that UnitBall outperforms AttH in the single hypernymy relation  
165 link prediction task. However, UnitBall cannot infer multiple relations like AttH for now. Motivated  
166 by our theoretical grounding and empirical success, we believe the future work of the complex  
167 hyperbolic embeddings will have promising improvements on multi-relational graph embeddings.

168 **References**

- 169 Beardon, A. F. *The geometry of discrete groups*, volume 91. Springer Science & Business Media,  
170 2012.
- 171 Chami, I., Wolf, A., Juan, D., Sala, F., Ravi, S., and Ré, C. Low-dimensional hyperbolic knowledge  
172 graph embeddings. In *ACL*, pp. 6901–6914. Association for Computational Linguistics, 2020.
- 173 Goldman, W. M. *Complex hyperbolic geometry*. Oxford University Press, 1999.
- 174 Gromov, M. Hyperbolic groups. In *Essays in group theory*, pp. 75–263. Springer, 1987.
- 175 Kobayashi, S. and Nomizu, K. *Foundations of differential geometry*, volume 1. New York, London,  
176 1963.
- 177 Mok, N. *Metric rigidity theorems on Hermitian locally symmetric manifolds*, volume 6. World  
178 Scientific, 1989.
- 179 Nickel, M. and Kiela, D. Poincaré embeddings for learning hierarchical representations. In *NIPS*, pp.  
180 6338–6347, 2017.
- 181 Nickel, M. and Kiela, D. Learning continuous hierarchies in the lorentz model of hyperbolic geometry.  
182 In *ICML*, volume 80 of *Proceedings of Machine Learning Research*, pp. 3776–3785. PMLR, 2018.
- 183 Ratcliffe, J. G., Axler, S., and Ribet, K. *Foundations of hyperbolic manifolds*, volume 149. Springer,  
184 1994.
- 185 Sonthalia, R. and Gilbert, A. C. Tree! I am no tree! I am a low dimensional hyperbolic embedding.  
186 In *NeurIPS*, 2020.
- 187 Wirtinger, W. Zur formalen theorie der funktionen von mehr komplexen veränderlichen. *Mathematis-*  
188 *che Annalen*, 97(1):357–375, 1927.
